# Supplementary material for: Blue-emitting single band ratiometric luminescent thermometry based on LaF3:Pr3+
Source: Royal Society of Chemistry journal article supplement (doi:10.1039/d1nj01869h), 2021-01-01
Supplement: d1nj01869h1.pdf [file d1nj01869h1.pdf]

## SUPPORTING INFORMATION

# Blue-Emitting Single Band Ratiometric Luminescent Thermometry based on $\text{LaF}_3:\text{Pr}^{3+}$

Joanna Stefanska<sup>1,\*</sup>, Kamila Maciejewska<sup>1</sup>, Lukasz Marciniak<sup>1,\*</sup>

<sup>1</sup> Institute of Low Temperature and Structure Research, Polish Academy of Sciences, Okólna 2, 50-422 Wrocław, Poland

\*corresponding authors: [j.drabik@intibs.pl](mailto:j.drabik@intibs.pl), [l.marciniak@intibs.pl](mailto:l.marciniak@intibs.pl)

**Keywords:** trifluorides, SBR, luminescent thermometry, praseodymium

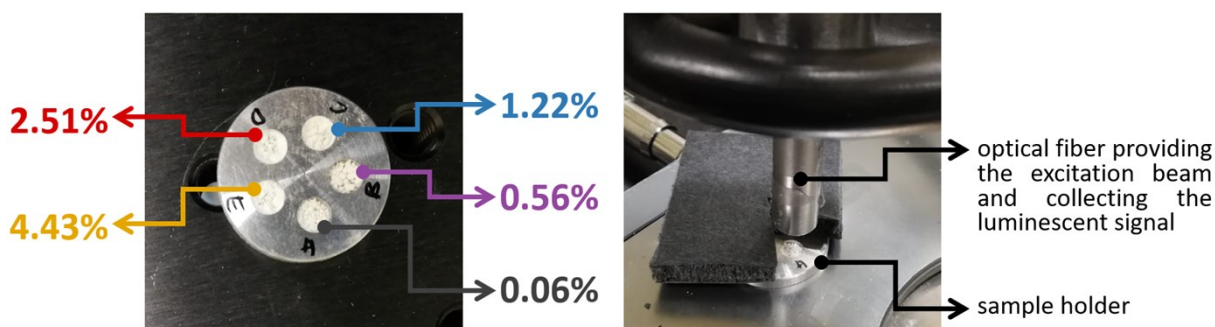

**Figure S1.** The system used to compare the emission intensities of the  $\text{LaF}_3:\text{Pr}^{3+}$  nanocrystals upon GSA-matched excitation.

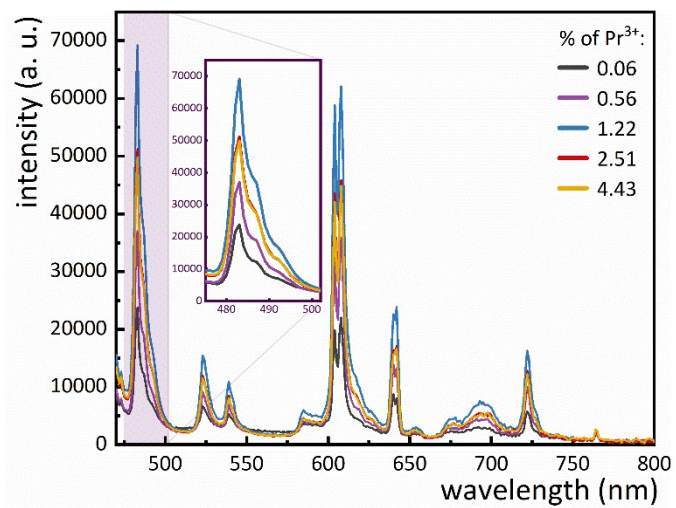

**Figure S2.** Comparison of the emission spectra of LaF<sub>3</sub> phosphors with different Pr<sup>3+</sup> ion concentrations measured using the measurement system illustrated in **Figure S1**.
